# Supplementary material
Source: ML conference proceedings conference paper supplement (https://openreview.net/forum?id=4JiZIwTnXty)
Supplement: supplementary_material [file attachment]

## Checklist

1. For all authors...
  - (a) Do the main claims made in the abstract and introduction accurately reflect the paper's contributions and scope? [Yes] Theoretical claims are supported by theorems and experimental claims are supported empirically.
  - (b) Did you describe the limitations of your work? [Yes] See Section 7
  - (c) Did you discuss any potential negative societal impacts of your work? [Yes] See Section 7
  - (d) Have you read the ethics review guidelines and ensured that your paper conforms to them? [Yes]
2. If you are including theoretical results...
  - (a) Did you state the full set of assumptions of all theoretical results? [Yes] We discussed them in each Theorem
  - (b) Did you include complete proofs of all theoretical results? [Yes] We include these in Supplementary materials.
3. If you ran experiments...
  - (a) Did you include the code, data, and instructions needed to reproduce the main experimental results (either in the supplemental material or as a URL)? [Yes] We provide these in the supplementary materials.
  - (b) Did you specify all the training details (e.g., data splits, hyperparameters, how they were chosen)? [Yes]
  - (c) Did you report error bars (e.g., with respect to the random seed after running experiments multiple times)? [Yes]
  - (d) Did you include the total amount of compute and the type of resources used (e.g., type of GPUs, internal cluster, or cloud provider)? [Yes] We describe these details in the supplementary materials.
4. If you are using existing assets (e.g., code, data, models) or curating/releasing new assets...
  - (a) If your work uses existing assets, did you cite the creators? [Yes] See Section 6
  - (b) Did you mention the license of the assets? [N/A]
  - (c) Did you include any new assets either in the supplemental material or as a URL? [Yes] See the Supplementary Materials.
  - (d) Did you discuss whether and how consent was obtained from people whose data you're using/curating? [N/A]
  - (e) Did you discuss whether the data you are using/curating contains personally identifiable information or offensive content? [N/A]
5. If you used crowdsourcing or conducted research with human subjects...
  - (a) Did you include the full text of instructions given to participants and screenshots, if applicable? [N/A]
  - (b) Did you describe any potential participant risks, with links to Institutional Review Board (IRB) approvals, if applicable? [N/A]
  - (c) Did you include the estimated hourly wage paid to participants and the total amount spent on participant compensation? [N/A]

## A Proof of Theorem 2 & 3

Suppose the loss function  $\mathcal{L}$  is decomposable over state action pairs, then we can write, Equation (2) as following:

$$\begin{aligned} \min_{\hat{\pi}} \max_{\tilde{\pi}} \sum_{t=1}^T \left[ \sum_{\substack{\hat{s}, \hat{a} \\ \check{s}, \check{a}}} \left[ P(\hat{S}_t = \hat{s}, \hat{A}_t = \hat{a} | \hat{\pi}, \Gamma) \mathcal{L}(\hat{s}, \check{s}, \hat{a}, \check{a}) P(\check{S}_t = \check{s}, \check{A}_t = \check{a} | \tilde{\pi}, \Gamma) \right] \right] \quad (12) \\ \text{subject to: } \sum_{t=1}^T \sum_{\check{s}, \check{a}} P_t(\check{S}_t = \check{s}, \check{A}_t = \check{a} | \tilde{\pi}, \Gamma) \phi(\check{s}, \check{a}) = \tilde{\boldsymbol{\mu}}. \end{aligned}$$

By introducing dual variables  $\mathbf{w}$  for the feature expectation constraints, the Lagrangian function of Equation (12) is given by:

$$\begin{aligned} \min_{\hat{\pi}} \max_{\tilde{\pi}} \min_{\mathbf{w}} \sum_{t=1}^T \left[ \sum_{\substack{\hat{s}, \hat{a} \\ \check{s}, \check{a}}} \left[ P(\hat{S}_t = \hat{s}, \hat{A}_t = \hat{a} | \hat{\pi}, \Gamma) \mathcal{L}(\hat{s}, \check{s}, \hat{a}, \check{a}) P(\check{S}_t = \check{s}, \check{A}_t = \check{a} | \tilde{\pi}, \Gamma) \right] \right] \quad (13) \\ + \mathbf{w} \cdot \left( \sum_{t=1}^T \left[ \sum_{\check{s}, \check{a}} P_t(\check{S}_t = \check{s}, \check{A}_t = \check{a} | \tilde{\pi}, \Gamma) \phi(\check{s}, \check{a}) \right] - \tilde{\boldsymbol{\mu}} \right) \end{aligned}$$

The optimization in Equation (13) is over  $\hat{\pi}$  and  $\tilde{\pi}$ . However, the objective function Equation (13), decomposes over the state-action distribution induced by policies  $\hat{\pi}$  and  $\tilde{\pi}$ . We directly optimize over the marginals:

$$\begin{aligned} \min_{(p_1, p_2, \dots, p_T)} \max_{(q_1, q_2, \dots, q_T)} \min_{\mathbf{w}} \sum_{t=1}^T \left[ \sum_{\substack{\hat{s}, \hat{a} \\ \check{s}, \check{a}}} \left[ p_t(\hat{s}, \hat{a}) \mathcal{L}(\hat{s}, \check{s}, \hat{a}, \check{a}) q_t(\check{s}, \check{a}) \right] \right] \quad (14) \\ + \mathbf{w} \cdot \left( \sum_{t=1}^T \left[ \sum_{\check{s}, \check{a}} q_t(\check{s}, \check{a}) \phi(\check{s}, \check{a}) \right] - \tilde{\boldsymbol{\mu}} \right), \end{aligned}$$

where  $p_t(\hat{s}, \hat{a}) = P(\hat{S}_t = \hat{s}, \hat{A}_t = \hat{a})$  and  $q_t(\check{s}, \check{a}) = P(\check{S}_t = \check{s}, \check{A}_t = \check{a})$ . This optimization needs to be over valid state-action marginals (marginals induced by a policy). So the following constrained need to be satisfied:

$$\Omega := \sum_{\hat{s}, \hat{a}} p_t(\hat{s}, \hat{a}) P(\hat{s}' | \hat{s}, \hat{a}) = \sum_{\hat{a}} p_t(\hat{s}', \hat{a}) \quad \forall t, \hat{s}'$$

$$\text{Similarly for } q_t, \quad \sum_{\check{s}, \check{a}} q_t(\check{s}, \check{a}) P(\check{s}' | \check{s}, \check{a}) = \sum_{\check{a}} q_t(\check{s}', \check{a}) \quad \forall t, \check{s}'$$

Since Equation (14) is convex in all variables  $p_t$ ,  $q_t$ , and  $\mathbf{w}$ , the order of optimization can be changed:

$$\min_{\mathbf{w}} \max_{\mathbf{Q} \in \Omega} \min_{\mathbf{P} \in \Omega} \left[ \sum_{t=1}^T \left[ \sum_{\substack{\hat{s}, \hat{a} \\ \check{s}, \check{a}}} p_t(\hat{s}, \hat{a}) \mathcal{L}(\hat{s}, \check{s}, \hat{a}, \check{a}) q_t(\check{s}, \check{a}) + \mathbf{w} \cdot \sum_{\check{s}, \check{a}} q_t(\check{s}, \check{a}) \phi(\check{s}, \check{a}) \right] - \mathbf{w} \cdot \tilde{\boldsymbol{\mu}} \right],$$

where  $\mathbf{P} = (p_1, p_2, \dots, p_T)$  and  $\mathbf{Q} = (q_1, q_2, \dots, q_T)$ . □

The proof for stationary case is similar.
